# Supplementary material
Source: publisher figshare collection journal article supplement (https://geolsoc.figshare.com/ndownloader/files/27869701)
Supplement: Supplementary file 1 [file 27869701]

Chuvashov, B.I. 2010. The Urals and Yekaterinburg through the eyes of a foreigner in the middle of the 19th century. Vestnik Permskovo Universiteta, Geologiya 1(9), 79–89. (In Russian). [Чувашов Б.И. 2010. Урал и Екатеринбург глазами иностранца в середине XIX века // Вестник Пермского университета. Геология. 2010. Вып. 1. № 9. С. 79–89.]

**Урал и Екатеринбург глазами иностранца в середине XIX века Б.И. Чувашов**

Институт геологии и геохимии УрО РАН, Екатеринбург E-mail: Chuvashov@igg.uran.ru
*(Статья поступила в редакцию 16 сентября 2010 г.)*

Знаменитый английский геолог Р.И. Мурчисон возглавил интернациональные геологические экспедиции в Россию в 1840 и 1841 гг., создал первую геологическую карту и дал описание геологического строения Европейской России и Урала. Экспедицией Р.И. Мурчисона была выделена пермская система. Интересны его краткие описания геологических объектов, быта населения и промышленности региона, взаимоотношений разных слоев граждан в императорской России.

Ключевые слова: *пермская система, персоналия, Р.И. Мурчисон.*

Познакомиться с краткой биографией Р. Мурчисона, замечательного человека из далекого времени, его многогранной деятельностью, нам помогут довольно полный биографический очерк Н.С. Шатского (1986) [2] о его жизненном пути, а также занимательная книга пермского геофизика С.Е. Ваксмана (2007) [1].

Родерик Импи Мурчисон (рис.1) родился 19 февраля 1792 г. в графстве Россшайр, в северо-западной Шотландии. В 1799 г. Родерик был отдан в начальную школу графства Дарем, а в 13 лет в 1805 г. его устроили в Королевский военный колледж в окрестностях Лондона. В 1807 г. он получает назначение в 36-й пехотный полк без занятия определенной должности. В следующем году полк в составе корпуса, которым командовал генерал Веллеслей (будущий герцог Веллингтон), поддержал восстание португальцев против Наполеона. После нескольких удачных боев в стычках с французами полк потерпел серьезное поражение и был вывезен в Англию. Закончилась шестимесячная боевая карьера Мурчисона.

Затем последовала длительная гарнизонная служба в том же полку в Англии, Италии, на о-ве Сицилия. В 1815 г. он перешел в кавалерию с желанием сделать карьеру на военной службе. Но война на континенте с Наполеоновской армией завершилась, и надежд на быстрое продвижение по службе не оставалось.

В том же 1815 г. Р. Мурчисон женился и вышел в отставку. Под влиянием жены Мурчисон из охотника за лисами превратился вначале в натуралиста-любителя, а затем в профессионального геолога.

Его геологическая карьера делится Н.С. Шатским на три периода.

*Первый период – 1824–1830 гг.* – обучение геологии и подготовка к будущим исследованиям. В эти годы большинство работ написаны им совместно с Седжвиком и Ч. Лайелем. В некоторых геологических экскурсиях участвовал как помощник Седжвика молодой Ч. Дарвин.

*Второй период продолжался с 1831 по 1845 г.* В это время были выполнены основные геологические исследования Мурчисона: он совместно с Седжвиком обосновал на английском материале две геологические системы–силурийскую и девонскую, выделил в России пермскую систему. Каждой системе на территории Англии посвящались капитальные монографии. В конце этого периода была завершена работа по геологии Европейской России и Уральского хребта.

*Третий период, охватывающий 1846–1871 гг*., – время напряженной научноорганизационной деятельности. В 1855 г. Р. Мурчисон занял пост директора Геологической службы Великобритании и директора Лондонского музея практической геологии. Он активно работал в Совете Лондонского геологического общества с 1826 по 1868 г. С 1844 г. почти до самой смерти Р. Мурчисон был бессменным председателем Королевского географического общества.

Научные заслуги геолога были отмечены многими знаками отличий и почестями. Он был избран действительным членом Петербургской академии наук, почетным доктором многих европейских и американских университетов. В 1846 г. был посвящен в рыцари, а в 1866 г. стал баронетом. Скончался знаменитый ученый-геолог в 1871 г.

Р. Мурчисон по своим убеждениям оставался консерватором. Он до конца жизни не признал учения Ч. Лайеля, не понял также событий крупных площадных оледенений на Земле в геологическом прошлом, несмотря на то, что был хорошо знаком с ледниками Альп. Он принадлежал к тем англичанам, которые были возмущены выводами Ч. Дарвина о родстве обезьяны и человека.

**О путешествиях в Россию**

**Первое путешествие Р. Мурчисона в Россию (1840 г.)**

Что привлекало Р . Мурчисона в России? Прежде всего проблемы стратиграфии Англии. Развитые на территории острова силурийские и девонские отложения сильно дислоцированы каледонским орогенезом, и взаимоотношения между отдельными частями разреза были весьма спорными. На территории северо-запада России те же по возрасту породы залегают практически горизонтально, и положение различных толщ не вызывало сомнений. Проверка правильности толкования осадочных образований о-ва Великобритания на примере обширных пространств Российской империи была первой задачей путешествия.

Возможность путешествия в Россию открылась при знакомстве Р. Мурчисона с московским специалистом по экономике и первым организатором общества по изучению природных богатств России А. Мейендорфом. Встреча состоялась в Париже, где Мурчисона представил Мейендорфу французский палеонтолог Э. Де Вернейль. При этой встрече была достигнута договоренность, что в июне – августе 1840 г. Вернейль и Мурчисон совершат путешествие по России совместно с Мейендорфом. В начале экскурсии в июне этого года, перед отъездом экспедиционной группы из С.-Петербурга, Мурчисон был представлен также министру финансов России графу Канкрину, который выступил гарантом экспедиции.

Первые исследования были проведены в окрестностях С.-Петербурга, по берегам рек. Волхов и Сязь, а также по западному берегу Онежского озера. Затем экспедиция разделилась, и к группе Мурчисона и Вернейля присоединился минералог Н.И. Кокшаров. Эта группа проехала от Вытегры до Архангельска, где ее члены осмотрели берега Белого моря и р. Пинеги. Затем вдоль берегов р. Северной Двины путешественники добрались до Великого Устюга, а далее по р. Сухоне до г. Вологда. Из Вологды через г. Череповец они проехали до Ярославля и Костромы, где вновь соединились с группой Мейендорфа. Затем был изучен отрезок берегов р. Волги до Юрьевца. После этого экспедиция вернулась в Москву, где Мурчисон и Вернейль познакомились с геологией окрестностей города и сделали экскурсии в Нижний Новгород, Муром, Касимов, Рязань и др.

В северо-западной части России эти геологи смогли распознать, кроме древних кристаллических пород, залегающие на них образования силура, древнего красного песчаника. По возвращении в Англию Р. Мурчисон от себя и Э. Вернейля представил *Британской ассоциации по развитию науки* доклад о результатах полевых работ в России, смысл которых сводился к корреляции силурийскодевонских отложений Великобритании и России и к подтверждению девонского возраста древнего красного песчаника на палеонтологическом материале России.

**Второе путешествие Р. Мурчисона в Россию в 1841 г.**

Обработка полевых материалов зимой 1840 г. еще более обострила интерес Мурчисона к геологии России. Кроме того, он получил весьма лестное для себя приглашение от правительства Российской империи продолжить работы по изучению геологии страны.
В апреле 1841 г. экспедиция выехала в Россию. Кроме Мурчисона в состав экспедиции вошел Э. Вернейль, а также два российских геолога – А.А. Кейзерлинг и Н.И. Кокшаров. После переезда из Петербурга в Москву геологи обследовали строение Подмосковного угольного бассейна. Затем экспедиция разделилась на два отряда.

Один отряд двинулся до Казани через Арзамас, Пензу и Симбирск. Второй отряд – Мурчисона – шел по Волге через Владимир и Нижний Новгород. Дальнейшее совместное изучение геологического строения Русской равнины происходило по рекам Каме и Вятке до Молмыжа, затем по тракту на г. Оханск. Изучив палеозойские отложения в районе г. Перми, Соликамске и далее по р. Сылве у Кунгура, экспедиция двинулась к Екатеринбургу по старому Московскому тракту с боковым маршрутом в Нижние Серги (рис.2).

О маршрутах экспедиции на Урале мы узнаем из полевых записок Мучисона, которые цитируются ниже. После возвращения из северных маршрутов (рис. 3) в Екатеринбург экспедиция спустилась по р. Исеть до с. Колчедан, вблизи которого дислоцированные палеозойские образования Урала перекрываются горизонтально лежащими мезокайнозойскими осадками Западной Сибири.

После этого маршрута экспедиция снова разделилась на два отряда. Отряд Кейзерлинга пересек Урал и от Нижних Серег по р. Уфе спустился вниз, определив границу между палеозойскими породами и артинскими песчаниками. Мурчисон и Вернейль продолжили изучение геологии восточного склона Урала. Затем отряды соединились в г. Златоусте.

После серии совместных экскурсий в окрестностях этого города отряд вновь разделился. Вернейль и Кейзерлинг через Саткинский и Симский заводы отправились к г. Уфа, а затем в Оренбург. Группа Мурчисона и Кокшарова проследовала через Миасс и Ильменские горы, перебралась затем в район Троицка, а оттуда на р. Урал. Двигаясь по долине этой реки, путешественники достигли Оренбурга.

После совместных поездок в его окрестностях группа Кейзерлинга двинулась вниз по р. Урал до Киргизских степей. Мурчисон и Вернейль двигались по тракту от Оренбурга до г. Верхнеуральска, от которого пересекли Уральский хребет в направлении Стерлитамака. На этом было закончено изучение геологии Уральского хребта.

Далее экспедиция посетила ряд пунктов на юге России, с особенным вниманием были изучены строение Донецкого кряжа и структура Воронежского щита – выходов древних кристаллических пород фундамента Русской платформы. Через г. Харьков, Белгород,

Курск, Орел и Москву члены экспедиции вернулись в российскую столицу. Глубокой осенью 1841 г. Мурчисон возвратился в Англию.

Его экспедицией был освоен маршрут протяженностью более 20 тыс. км с посещением разных районов обширной ВосточноЕвропейской платформы, нескольких пересечений Урала, состоялось знакомство с территорией Прикаспийской впадины, были изучены Донецкий авлакоген и Украинский щит.

Период между 1841 и 1845 гг. был заполнен обработкой материалов двух путешествий, многочисленными докладами и публикациями. В 1845 г. опубликован двухтомный труд " The Geology of Russia in Europe and the Ural Mountains". Первый том был написан главным образом Мурчисоном. А. Кейзерлинг добавил к нему описание геологического строения Тимана, прилегающих районов бассейна Печоры, Полярного Урала. Этот том был написан на английском языке.

Второй том касался, главным образом, палеонтологии России. Палеозойская фауна была описана Э. Вернейлем, А. д'Орбиньи дал описание мезозойских и кайнозойских окаменелостей. Второй том был на французском языке.

Более 40 лет геологи России воспринимали геологию страны с позиций Р. Мурчисона, что можно показать на примере пермской системы. В понимании английского геолога к пермской системе были отнесены только верхняя часть современного кунгурского яруса, уфимский, казанский и татарский ярусы верхней перми. Все многообразные отложения современного нижнего отдела Мурчисоном рассматривались в составе каменноугольной системы.

С позиций современной стратиграфии Урала и Европейской России Мурчисон сделал много ошибок в определении возраста пород. Так, пермские красноцветы северозапада России он считал каменноугольными отложениями. При проезде по московскому тракту от Кунгура до Екатеринбурга терригенные (обломочные) породы в бассейне р. Бисерть Мурчисон также сравнивал с каменноугольными толщами Англии. Но эти неточности на фоне полной стратиграфической неопределенности региона вполне объяснимы.

Впоследствии Р . Мурчисон приложил много усилий при внедрении понятия «пермская система» в геологический обиход. В то время примерно одновозрастные русской перми отложения Центральной и Западной Европы определялись понятием **«диас»**, т. е. двухчленные, т.к. они включали две толщи – нижнюю под названием «мертвый красный лежень» и верхнюю – «цехштейн», состоящую из гипсово-ангидритовых, соляных и карбонатных отложений, внешне похожих на наш кунгур. Нижняя толща получила название «мертвый лежень» по причине отсутствия морских окаменелых организмов.

В последующем установление современного объема пермской системы в России было сложным и длительным процессом. А.П. Карпинский (1874) при изучении пограничных каменноугольно-пермских отложений Западного Урала нижний отдел рассматривал как переходное подразделение от карбона к перми – "пермокарбон", которому он дал второе название – артинский ярус. Первым исследователем, который решился отнести "пермокарбон" к перми, был А.А. Краснопольский (1889) – старший геолог Геологического комитета России при завершении геологической съемки на западном склоне Среднего Урала.

Из артинского яруса А.П. Карпинского затем вычленили составляющие нижний отдел пермской системы ассельский, сакмарский, артинский ( в сокращенном объеме) и кунгурский ярусы современной шкалы.

Вклад Р. Мурчисона в становление и развитие российской геологии всегда положительно оценивался геологами страны. В военный 1941 г. столетие его путешествия по России было отмечено сотрудниками Горного института в Свердловске. В честь 150-летия этого события Уральское отделение АН СССР организовало силами Института геологии и геохимии, Горного института УрО АН СССР, ВСЕГЕИ, Института геологии Коми НЦ, Пермского и Казанского университетов Международный геологический конгресс «Пермская система земного шара», в котором приняли участие более 500 геологов, в том числе 90 участников из США, Канады, ряда стран Западной Европы, Средней Азии, Китая. Это событие было отмечено памятной медалью (рис. 4, 5). В июне 2009 г. на Чусовой у с. Чусовое по инициативе Урало-Шотландского общества Екатеринбурга был установлен памятный знак Р. Мурчисону и его коллегам (рис. 6) и проведена полевая конференция с серией докладов. В следующем 2011 г. предполагается отметить 170-летие международной геологической экспедиции.

На этом завершим вводную часть публикации и вернемся к раскрытию темы, обозначенной в заголовке публикации, для чего приведем некоторые выдержки из недавно опубликованной Геологической службой Великобритании книги " Странствия Мурчисона по России" ( Murchison's Wandering in Russia, 2004). Книга была любезно подарена нам сотрудником Геологической службы Великобритании Майклом Стефенсоном, который был участником Международного полевого симпозиума "Ярусные стратотипы нижнего отдела пермской системы на Урале". Симпозиум был проведен Лабораторией стратиграфии и палеонтологии Института геологии и геохимии УрО РАН в июле – августе 2007 г.

Путевые дневники сэра P. Мурчисона вкупе с примечаниями редакторов и довольно многочисленными рисунками (рис. 7,8) составили 475с. К ним приложена Геологическая карта Европейской России и Урала, составленная под руководством Мурчисона. Мы ограничимся переводом той части книги, где приводятся впечатления этого замечательного геолога об Урале и некоторых городах (с. 223–231). Обзор итогов пребывания Мурчисона на Урале предполагается представить во второй публикации. Оригинальный текст Мурчисона выделен курсивом.

**Екатеринбург и окрестности**

*В Екатеринбурге обитают 18 тысяч жителей, в большинство горняки и торговцы, зависимые в своей деятельности от государственных рудников. Главный директор горного корпуса, артиллерийский генерал Глинка, является здесь всевластной личностью. Глинка отсутствовал в городе, когда мы прибыли, в связи с отъездом в СанктПетербург, но той же ночью вернулся.*

*Утром был устроен levee (всеобщий сбор.– Б.Ч.), на котором я был центром внимания. Когда я вошел в помещение, сорок горняков в мундирах с красными воротниками окружили меня. Через полчаса появился генерал. Он мгновенно опознал меня из группы гостей, оделил разными комплиментами и в заключение пригласил на следующий день на персональный обед, без levee. Затем он обошел всех вокруг и поздоровался* (в тексте здрастие. – Б.Ч.) *с каждым участником собрания.*

*Город простирается вдоль волнистого тракта значительной ширины на обеих сторонах небольшой реки Исеть (в тексте Issеtz.– Б.Ч.), течения которой не видно, т.к. река запружена выше завода, образуя пруд для обеспечения его работы. Как обычно в России окрестности пруда являются местом собрания жителей.*

*Главная улица, пересекающая низину с прудом, ориентирована на восток, а все остальные улицы перпендикулярны ей. Почти треть города состоит из побеленных домов с зелеными железными крышами. Небольшое число домов кирпичные, но в основной массе дома деревянные, коричневые, низкие.*

*В целом, город поражает разнообразными бело-зелеными церквами с их высокими колокольнями. Административное здание* (Управление уральскими горными заводами. – Б.Ч.) *и Монетный двор – яркие и пышные снаружи постройки, подобны сверкающим бабочкам среди леса. По правде говоря, весь тракт только частично проходит через природный лес. Постепенно все старые деревья были вырублены, поскольку не выстояли с времен Петра I. Лес, как я думаю, настолько же обновлен, как и у городов янки* (США.– Б.Ч.)*, возле западной границы прерий и леса.*

*В Екатеринбурге добывается столько золота, сколько не производят другие города на Урале. Количество добываемого золота со временем значительно не уменьшилось, хотя для извлечения того же самого веса требуется переработка большего объема грунта, больше рабочих и увеличенных расходов, чем ранее.*

*Когда вы оглянетесь из города на запад, вы будет удивлены: "Где же эти холмы, через которые Вы только что проезжали ?". Действительно, уклоны местности настолько малы, что никаких хребтов не видно, и вы находитесь в почти ровной лесистой местности.*

*Кроме горного производства, район имеет и Монетный двор, в котором штампуется 19/ 20 всех копеек, производимых в России. Механизмы этого предприятия управляются англичанином Тэйтом (Tait) толстым, добродушным "Джоном Буллем" , разговаривающим на ломаном английском с забавным акцентом Ньюкасла. Он провел здесь много лет, едва ли встречая земляков, и забыл добрую долю родного наречия, будучи женат на добродушной " жарман", как он говорил мне о своей жене. В разговоре Тэйт едва сводил концы с концами на уровне своего примитивного датского, с русскими идиомами и забавными словечками, выдавая порой такие откровенные нелепости, что я с большим трудом сдерживался, чтобы не расхохотаться в его присутствии.*

*Тэйт посещал многочисленные заводы, чтобы установить или отремонтировать машины, и имел в запасе много забавных случаев во время поездок без хорошего описания маршрута, без карт и с таким объяснением пути " надо ехать до той фермы, а потом до другой".*

*Тейт был моим переводчиком в этой азиатско-русской столице шахт; Его превосходительство генерал Глинка не говорил свободно ни на одном языке, что спасало его (*Тейта*. – Б.Ч.) при переводе от немилостей начальства. В таком же положении был полковник – комендант, очень достойный добродушный господин, с которым я вчера обедал, и где Тейт эффектно щеголял своей речью. Поскольку Глинка говорил на немецком, как и я "aber schlecht" (*немецкое очень плохо. – *Б.Ч.), мы все же кое-как могли общаться.*

*Кроме Монетного двора и шахт здесь находится большое предприятие* (Гранильная фабрика. – Б.Ч.) *для полировки декоративного камня, изделия которого украшают Императорские дворцы в Санкт Петербурге. Директором этого предприятия был полковник* < пропуск в записях > *и начальник Горной школы. Два главных водяных колеса, смонтированные упомянутым выше Тейтом, вращаются, выполняя различные операции – от распиловки блоков до первого грубого обтачивания изделия. Мелкие маховики и ручные приспособления помогают выполнять деликатные операции при обтачивании ваз и обработке таких рельефных изделий, как камеи.*

*Основание изготовляемых на фабрике малахитовых ваз состоит из мягкого талькоподобного камня, несколько похожего на тальковые сланцы, из которых построен Замок Теймаут (Teimouth), добываемого в этом же районе. Этот камень широко используется, благодаря его мягкости и легкости при обработке. На тальковую основу наклеивают (подобно тому, как это делают столяры) тысячи кусочков или плиток малахита. Крошечные трещины между ними заполняются зеленой, похожей на воск массой, изготовленной из толченого малахита, воска и т.д. Затем поверхность мозаики тщательно полируется.*

*Некоторые наиболее крупные вазы стоят правительству менее 30 000 руб. (1 500 фунтов стерлингов), включая транспорт, работу и т.д., поскольку труд императорских рабочих ценится низко и производимая продукция очень дешевая. Можно утверждать, что вазы могли изготовляться здесь на продажу не менее чем за 3000 4000 фунтов стерлингов.*

*При нашем визите большая ваза в 9 футов* (2,7 м. – Б.Ч.)*, изготовленная из сибирского авантюрина с золотистыми блестками, находилась на последней стадии полировки. Эта порода* (сибирский авантюрин. – Б.Ч.) *происходит с горы Таганай, одной из наиболее высоких вершин Урала, расположенной невдалеке от Златоуста. Блок, из которого сделана ваза и ее пьедестал, первоначально весил 360 пудов.*****) Примечание редакторов. К этому позднее была сделана такая приписка: "...эта ваза, кажется, была изготовлена из того же материала, что и большая ваза с Колыванских гор Восточной Сибири, посланная мне императором Николаем".

*В процессе изготовления в мастерской также находились: облицовка камина из голубовато-серой полосчатой яшмы, с выступами для колокольных шнурков и другими принадлежностями для удобства использования, гербы для принца* (князя. – Б.Ч.) *Волковского* (Волконского? – Б.Ч.)*, камеи и др.*

*Недавно открытый минерал соломенной окраски – фенакит – очень нравится дамам Двора, поскольку имеет большое сходство с алмазом. Письменный гранит также очень популярен, т.к. напоминает страницы Корана. Я видел здесь образцы пород с большими кристаллы корунда в слюдяном сланце из окрестностей Миасса.*

*Полировка осуществляется наждаком (который добывается в 49 верстах от Екатеринбурга) из жил в мраморах. Он прокаливается и смешивается с обоженной известью до густой пасты. Это самое твердое вещество в природе, и вращающиеся колеса обеспечивают создание новых изделий.*

*Имели ли египтяне такие колеса? Мог ли многорукий Египет, обладая только такой пастой, создать свои чудеса? Даже сейчас, когда интенсивный труд и масса времени все еще требуются при всех усовершенствованиях, чтобы обработать эти твердые порфириты и яшмы, как мы должны восхищаться египетским масштабом работ!*

*Русская гостиница, или "гостиный двор", – забавна! Я пишу это в одной из самых лучших и чистых из них. Моя гостиная обставлена зелеными софами на хорошо покрашенном*

*полу. Занавесей или ставней, чтобы ослабить яркий свет шести окон, нет. Здесь я принимаю моих посетителей. В спальне, через которую они проходят, чтобы зайти ко мне, стоит моя собственная небольшая походная железная кровать, множество стульев и кресел. Спальня соединяется с другой комнатой, в которой расставлены буфеты со сладостями, бутылками с напитками и чайной посудой.*

*В другом крыле помещения в отдельной комнате располагается мой слуга. Таким образом, один человек и его спутник занимают весь этаж, такой же длины по фасаду, как Реформ Клуб* (известное здание в Лондоне. – Б.Ч.)*. Повсюду все хорошо побелено или покрашено, и я не встретил ни одной блохи к востоку от Волги, как и клопов и даже одиночных комаров. Это, действительно, наиболее чистая страна из тех, по которым я путешествовал, за исключением, некоторых благополучных частей Англии. Кроме того, это регион замечательных туалетов.*

*Ни один обед в Екатеринбурге не заканчивается без шампанского, стоимостью 18 шиллингов за бутылку. После этих обедов я был дважды пьян: один раз на приеме у коменданта, а этим вечером в доме достойных родителей моего юного друга Кокшарова*****).*

***** (известный минералог, спутник Мурчисона по путешествиям в России, впоследствии член Петербургской АН. –Б.Ч.)

*Мне показалось, что население этого края лучше управляется, чем в других районах России. Кражи настолько редки, что в городе Верхотурье* (Verchon? – Б.Ч.) *едва ли одна дверь закрывается на замок. Гостеприимство настолько безгранично, что жители никогда не откажут в хлебе и соли даже преступникам, бежавшим из Сибири.*

*Что меня особенно поразило, так это полное пренебрежение людей из высших слоев общества, даже обитающих вдоль трактов, к физической географии. В то же время крестьяне являются хорошими знатоками местности. Ни один тракт в России не показан на карте правильно, причем, чем меньше масштаб, тем более совершенна карта. Наиболее населенные губернии России и даже местности вокруг столиц и богатых районов вдоль Волги не имеют карт. Меня спасали скверные карты Шуберта, на которых сотни мелких деревушек с длинными названиями сливаются вместе, путая слабые попытки показать что-либо, находящееся на земле, хотя бы указаниями направления потоков.****** Даже это в большинстве случаев сделано плохо, а т.к. никаких обозначений холмов не сделано, вы никогда не определите по такой карте, течет ли река в болото или в горный хребет. Хорошая карта – благо для геолога, но это не касается карт Шуберта.*

*Я настолько устал от такой скверной продукции, что был по-настоящему рад, когда мы находились восточнее Волги и за пределами действия этих карт. Здесь я мог использовать нечто, похожее на карту Урала и его смежных территорий, составленную Гумбольдтом и его помощниками в Берлине. Эта карта, однако, была слишком мелкого масштаба, чтобы использоваться для детальных работ, особенно вдоль тракта, где каждая миля "имеет свою сказку". Она также дефектна для некоторых участков, особенно вдали от главных дорог. Например, между Малмадышем и Мамышем в Казанской губернии значительные заводы, с населением в несколько тысяч не отмечены, а деревни вдоль Камы нанесены с большими ошибками.*

*У Сергинского завода, южнее главной дороги между Казанью и Екатеринбургом на западном склоне Урала, я обнаружил, что некоторые речки не на месте. Но, даже со всеми дефектами, эта карта (Гумбольта) была для меня бесценна.*

*Будь я Императором России, я бы заставил, по крайней мере, одну тысячу моих ленивых офицеров в отделанных кружевами мундирах работать и составить для страны хорошую карту, в противном случае отправить их изучать физическую географию в Восточную Сибирь.*

*За исключением генерала Чевкина и очень, очень немногих других, я никогда не встречался с человеком, эрудированным во многих отношениях, который бы знал, как обращаться с картами. В действительности требуется всего лишь один час усилий, чтобы губернатор мог проложить свой путь по карте вдоль хорошо наезженной дороги. Я никак не могу забыть мое удивление в Нижнем Новгороде, когда вся резиденция губернатора была обыскана в поисках карты, на которой я мог бы проложить маршрут к югу от Москвы. Происходило это событие в богатом коммерческом центре России, красивом городе Нижний Новгород, в доме губернатора.*

*Касается ли это региональной карты Шуберта, которую я ранее тщательно анализировал? Нет! Велись поиски маленькой трехрублевой карты с названиями наиболее приметных мест и малых городов, которую покупает каждый путешественник. То же самое случилось в Костроме, где губернатор также не имел ни одной карты.*

*Если такое случается в сердце России, то можем ли мы ожидать, что провинциальные власти лучше информированы относительно их разобщенных и разнообразных регионов? Россия, прежде всего, должна вырастить географов, а только после – геологов.*

*Стоимость содержания одного подразделения кавалерии могла бы обеспечить решение этой важной для нации работы, если бы император мог понять ее желательность и эффективность для улучшения всех мероприятий в стране.*

*Я никогда не слышал, чтобы русский говорил, что какое-то селение расположено на восток, запад, север или юг от другого места, кроме простого указания количества верст от одного города до другого. Спроси его: в каком направлении находится тот или иной пункт, и он сразу замолкает. Единственное, что он может сказать после тщательного опроса, это направо или налево расположено селение, исходя из того, куда он ездил.*

*Увы, после такой фантастической информации я узнал насколько широко здесь все понимается. Например, вы можете найти людей, активно обсуждающих, на западном или восточном склоне Урала находится такое примечательное место, как Златоуст. Что же касается дорог, то путники здесь полагаются на умных крестьян, выносливых лошадей и крепкие тарантасы.*

*Дороги, показанные на карте Гумбольдта, может быть, и существовали в петровское время, но они уже непроходимы на колесах, и всякий русский из низших или высоких слоев, который ездил по ним, знает, что лошадиная дорога – не дорога. Например, старый тракт в Сибирь от Соликамска через хребет в настоящее время используется только зимой. Другие дороги, реально используемые, например на Златоуст, на карте не показаны.*

******) Заметка редакторов: следующее замечание сделано позднее: " На этот большой недостаток я специально указал императору при моем возвращении в Петербург, и я надеюсь, что сейчас в Европейской России есть хорошие карты".

*Определенно, сам дьявол участвовал в изобретении дрожек. Его сатанинское величество использовал свое влияние при создании этого сидения на колесах.*

*Что же касается меня, опытного охотника за лисами и кавалериста, то я не мог сидеть в них без страха, чувствуя отмирание части моего тела, поскольку ноги было невозможно ни вытянуть, ни согнуть свободно. Кажется, что эта машина специально сделана для особенной коротконогой расы двуногих..*

**Библиографический список**

1. *Ваксман С.* Вся Земля*.* Пермь, 2008. 318 с*.*2. *Шатский Н.С*. Родерик Импи Мурчисон // Портреты геологов. М.: Наука, 1986. С. 244–303. 3. *Murchison's* Wandering in Russia / еd. by Michaell Collie and John Diemer. British Geological Survey Ocashional Publication 2004. N. 2. 475 р.

**Foreigner’s View on the Ural and Ekaterinburg in the Middle of 19 century**

**B.I. Chuvashov**

Institute of Geology and Geochemistry. Urals Branch of RAS, Ekaterinburg E-mail: Chuvashov@igg.uran.ru

The famous English geologist R.I. Murchison has headed international geological expeditions in Russia (1840 – 1841). He created the first geological map of the region. Also he described a geological structure of the European Russia and the Urals. During the expedition Permian system was created. His short descriptions of geological objects, life of the population, the industry of region, relations of different layers of citizens in Russia are very interesting.

Key words*: Permian system; R.I. Murchison.*
